# Supplementary material
Source: PubMed Central journal article supplement (PMC2695118)
Supplement: 0903487106_0903487106SI.pdf [file 0903487106_0903487106SI.pdf]

# Supporting Information

Cheon and Stark 10.1073/pnas.0903487106

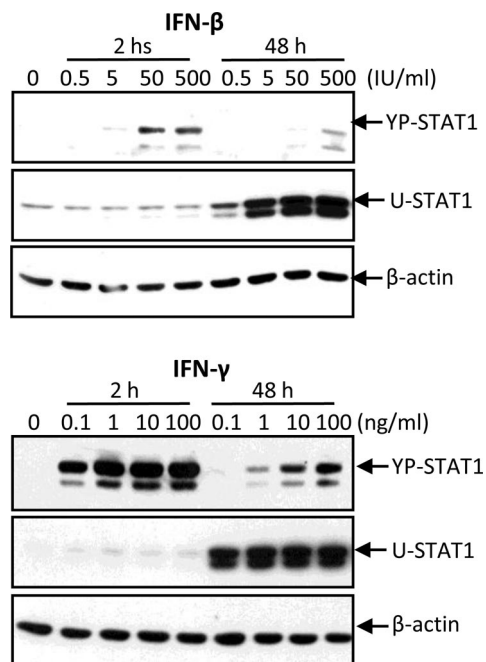

**Fig. S1.** IFN- $\beta$  or IFN- $\gamma$  increases the expression of U-STAT1. hTERT-HME1 cells were treated with IFN- $\beta$  (0.5–500 units/mL) or IFN- $\gamma$  (0.1–100 ng/mL) for 2 or 48 h. The amounts of YP-STAT1 and U-STAT1 were measured by the Western blotting method.





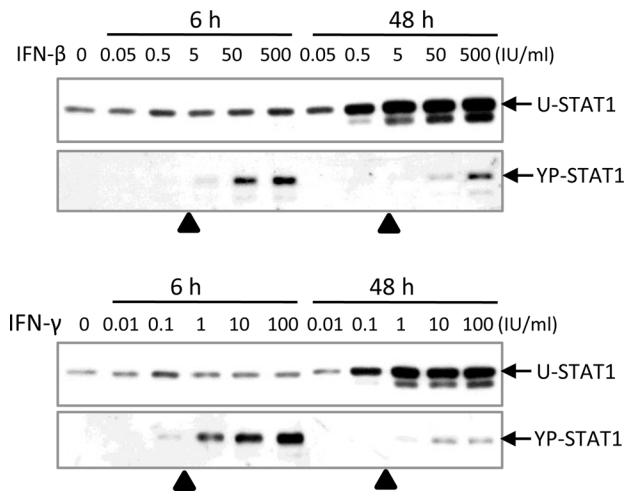

**Fig. S4.** Determination of IFN concentrations that induce maximum U-STAT1 but minimal YP-STAT1. BJ cells were treated with IFN- $\beta$  or IFN- $\gamma$  for 6 or 48 h to determine a concentration that induced the maximum level of U-STAT1 at 48 h with the minimum level of YP-STAT1. After additional experiments, the optimum concentrations were determined (indicated by arrowheads). The amounts of STAT1 and YP-STAT1 were determined by the Western blotting method.
